# Supplementary material for: Abnormal Serum Sodium is Associated With Increased Mortality Among Unselected Cardiac Intensive Care Unit Patients
Source: PubMed Central journal article supplement — J Am Heart Assoc. 2020 Jan 9;9(2):e014140. doi: 10.1161/JAHA.119.014140 (PMC7033827; doi:10.1161/jaha.119.014140), 2020-01-09

# **SUPPLEMENTAL MATERIAL**

Figure S1. Flow diagram demonstrating inclusion/exclusion criteria for the final study population.

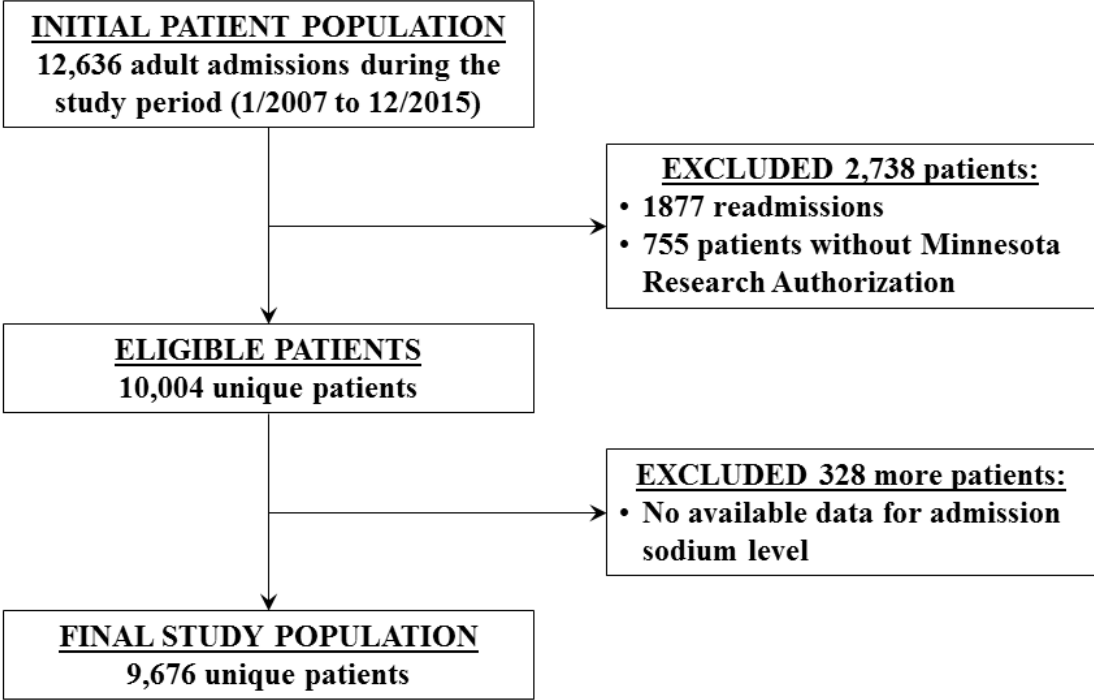

Supplement: JAH3-9-e014140-s001.pdf [file JAH3-9-e014140-s001.pdf]
